# Supplementary material
Source: PubMed Central journal article supplement (PMC1888678)

Figure S9-A: ChIP-chip of  $\gamma$ H2AX in senescent BJ fibroblasts

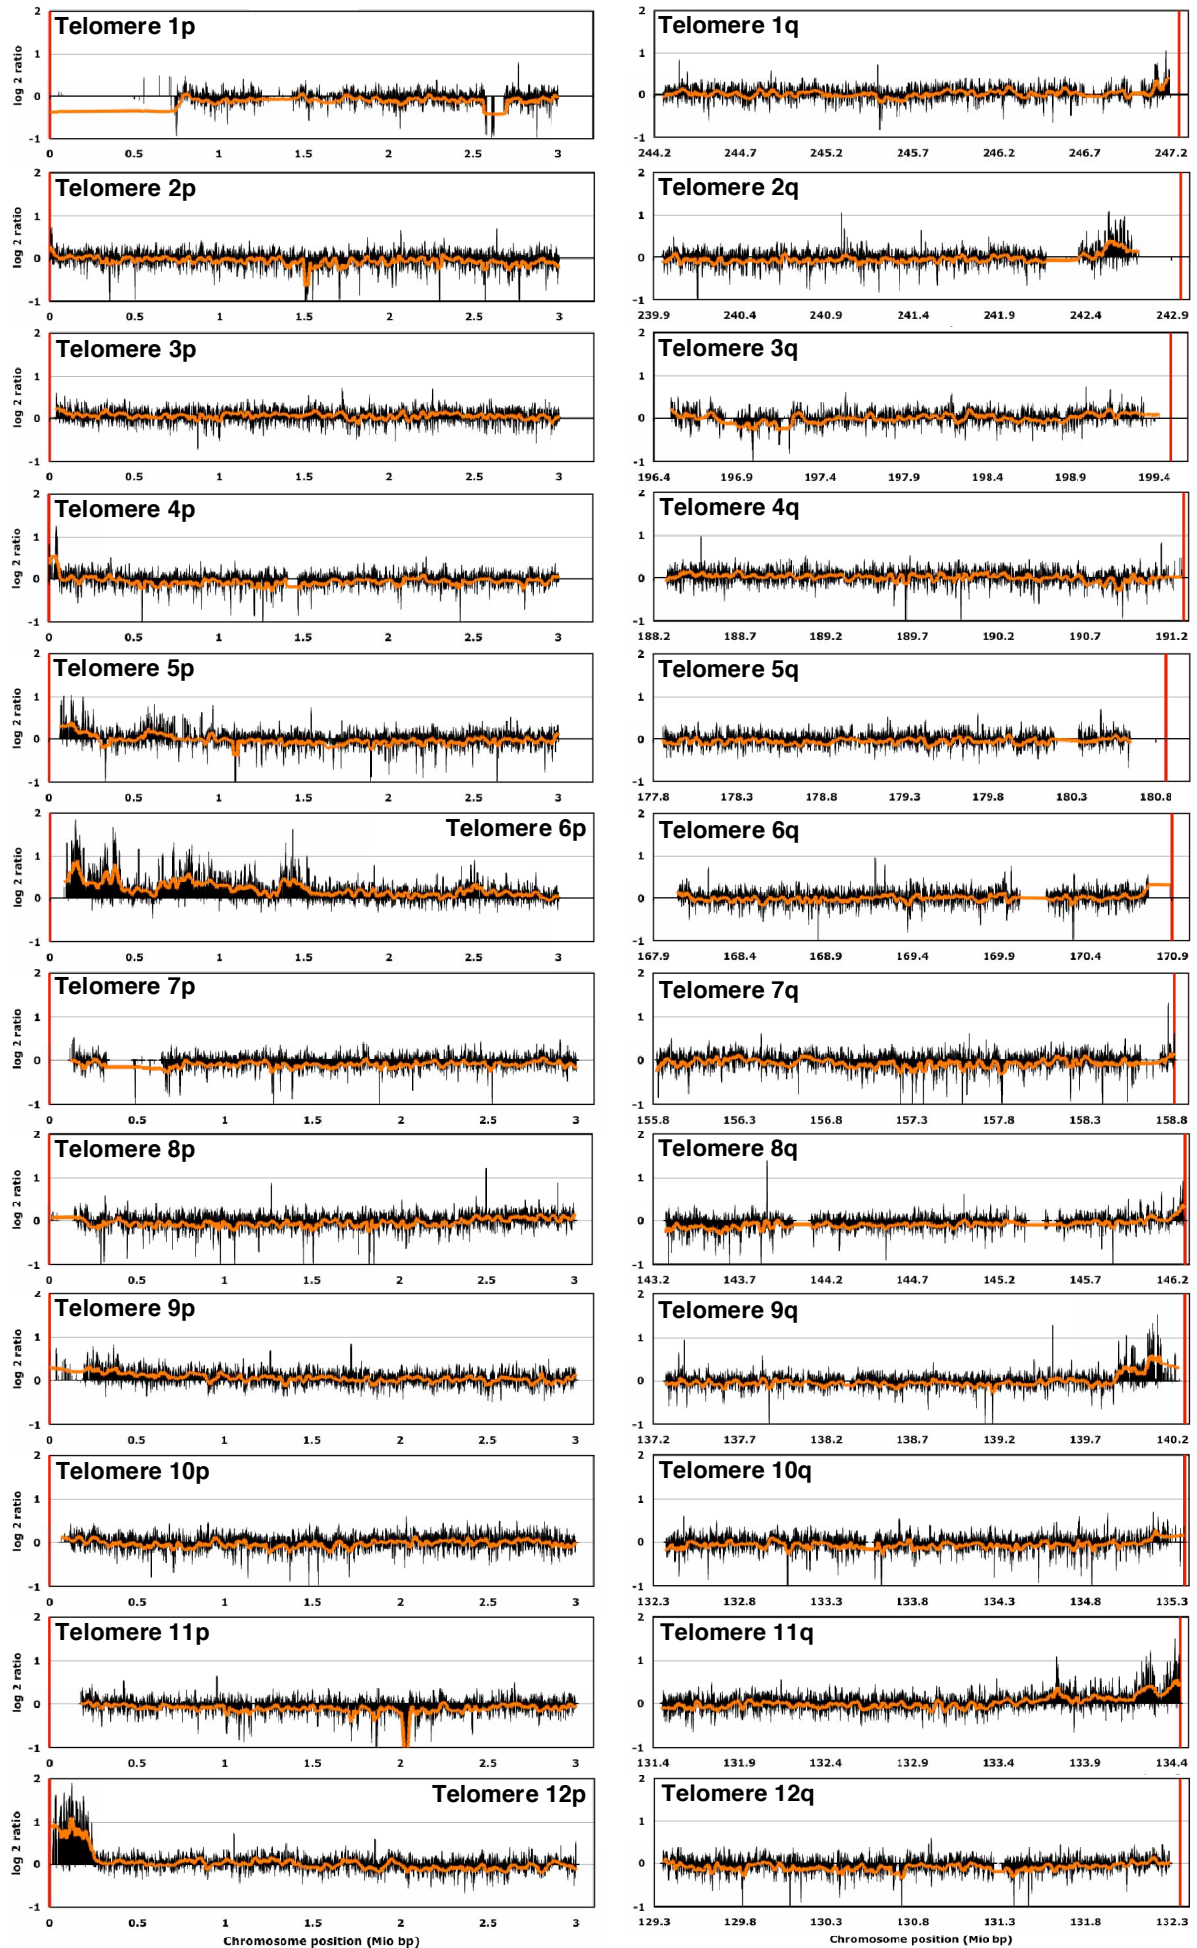

Figure S9-B: CHIP-chip of  $\gamma$ H2AX in senescent BJ fibroblasts

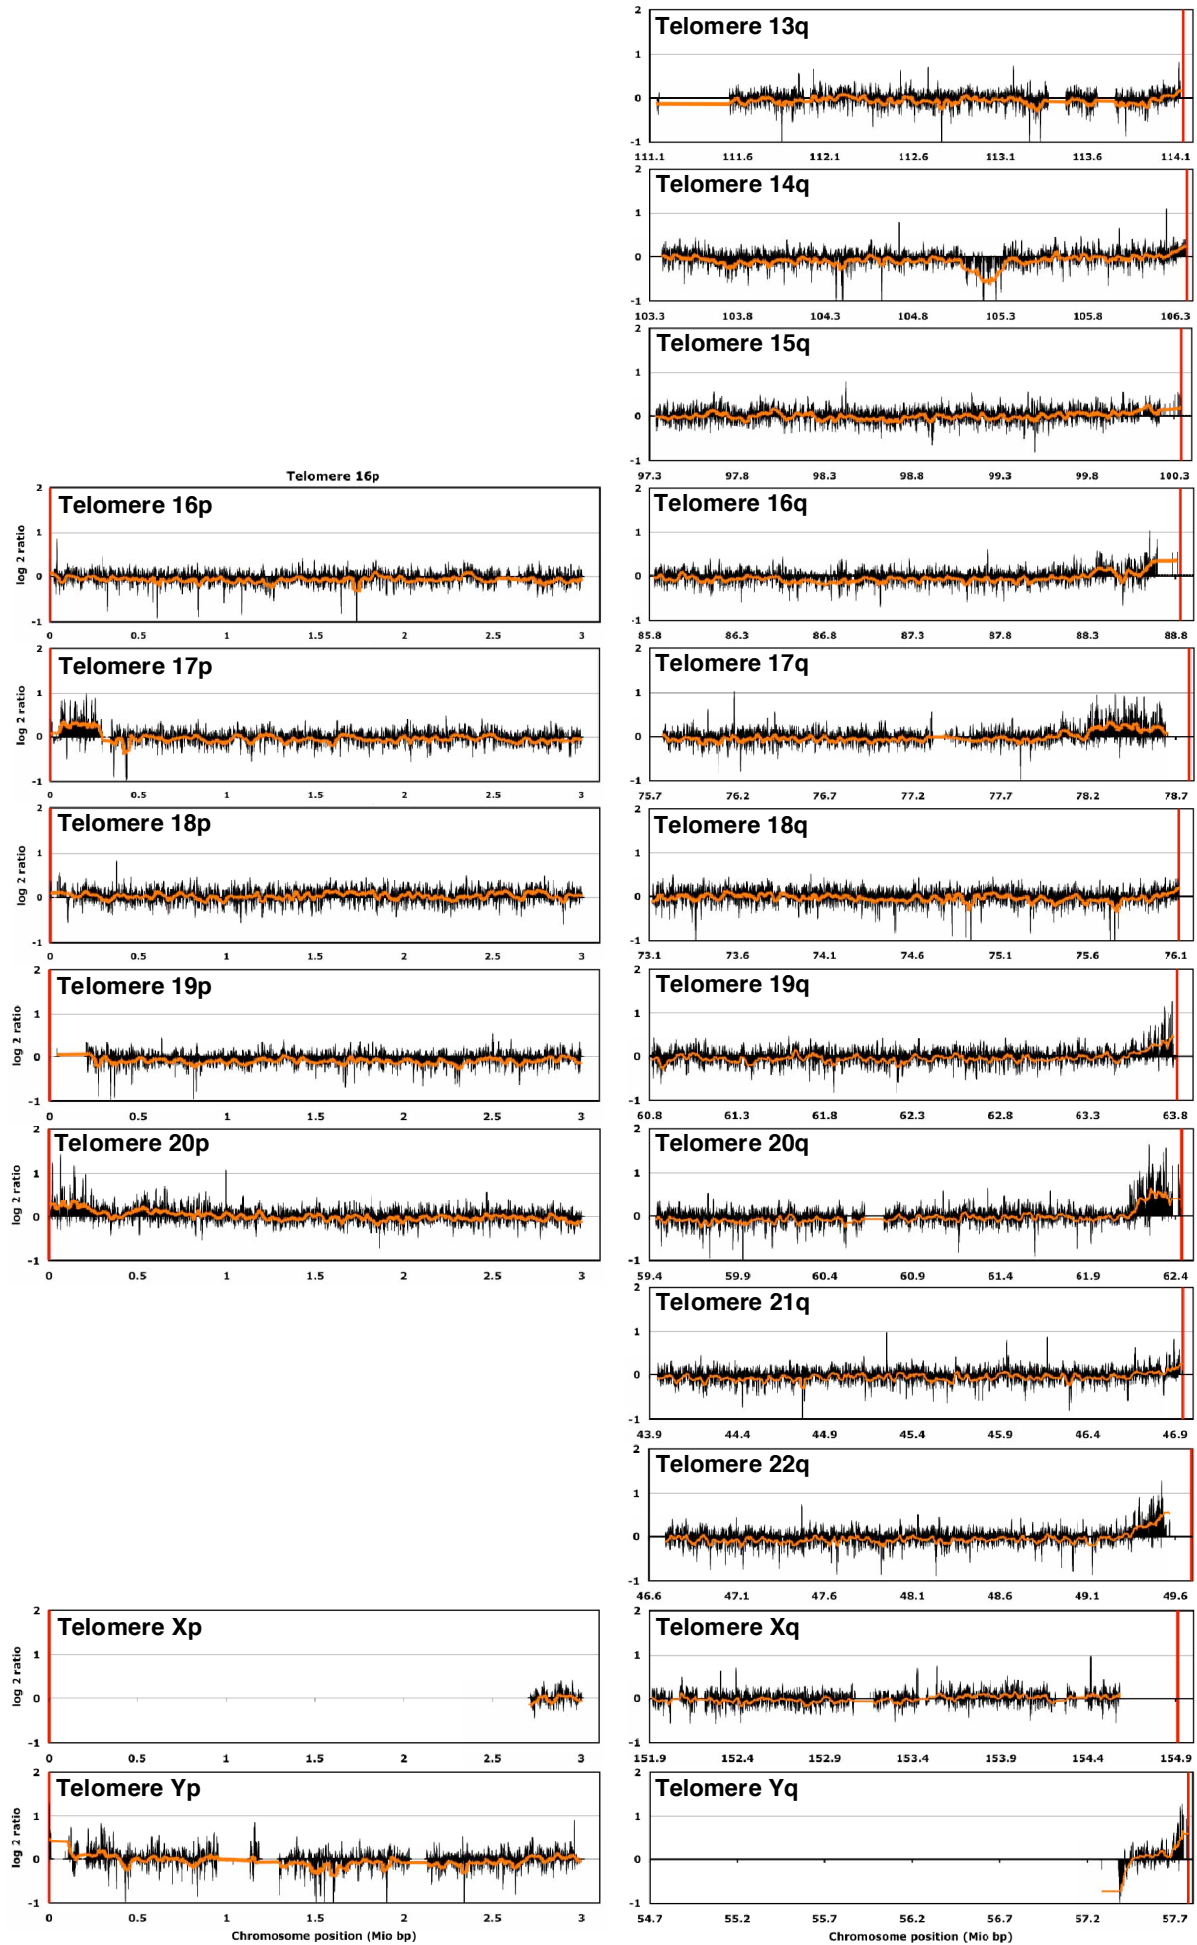

Supplement: 7601719s2.pdf [file 7601719s2.pdf]
